# Supplementary material for: Significant Decrease in Pertactin-Deficient Bordetella pertussis Isolates, Japan
Source: PubMed Central journal article supplement (PMC5367402; doi:10.3201/eid2304.161575), 2017-04
Supplement: 16-1575-Techapp-s1.pdf [file 16-1575-Techapp-s1.pdf]

# Significant Decrease in Pertactin–Deficient *Bordetella pertussis* Isolates, Japan

## Technical Appendix

Technical Appendix Table 1. Characteristics of *Bordetella pertussis* isolates, Japan, 2005–2016\*

| Isolate | Isolation year | Patient age | Vaccine status | Origin (district) | Pertactin production | <i>prn</i> gene                   | <i>prn</i> allele | MLVA type |
|---------|----------------|-------------|----------------|-------------------|----------------------|-----------------------------------|-------------------|-----------|
| BP285   | 2005           | 2 mo        | 0              | Kanto             | –                    | ΔSS                               | 1                 | 186       |
| BP291   | 2005           | 1 y         | 3              | Chubu             | –                    | ΔSS                               | 1                 | 186       |
| BP292   | 2005           | 1 mo        | 0              | Chubu             | –                    | ΔSS                               | 1                 | 226       |
| BP293   | 2005           | 4 mo        | 1              | Chubu             | –                    | ΔSS                               | 1                 | 186       |
| BP299   | 2005           | 5 mo        | 0              | Kyusyu            | –                    | ΔSS                               | 1                 | 186       |
| BP302   | 2005           | 1 mo        | 0              | Kinki             | –                    | 1598–                             | 1                 | 226       |
|         |                |             |                |                   |                      | 1599::IS481                       |                   |           |
| BP307   | 2006           | 2 mo        | 0              | Chubu             | –                    | 1598–                             | 1                 | 186       |
|         |                |             |                |                   |                      | 1599::IS481                       |                   |           |
| BP310   | 2006           | 11 y        | Unknown        | Tohoku            | –                    | ΔSS                               | 1                 | 194       |
| BP313   | 2006           | 58 y        | Unknown        | Kanto             | –                    | 1598–                             | 1                 | 186       |
|         |                |             |                |                   |                      | 1599::IS481                       |                   |           |
| BP322   | 2006           | 1 mo        | 0              | Kanto             | –                    | ΔSS                               | 1                 | 186       |
| BP323   | 2006           | 1 y         | Unknown        | Kanto             | –                    | ΔSS                               | 1                 | 186       |
| BP332   | 2006           | 35 y        | Unknown        | Kinki             | –                    | ΔSS                               | 1                 | 194       |
| BP333   | 2006           | 30 y        | Unknown        | Kinki             | –                    | ΔSS                               | 1                 | 194       |
| BP334   | 2006           | 0 y         | 0              | Kinki             | –                    | ΔSS                               | 1                 | 194       |
| BP314   | 2007           | 3 mo        | 0              | Kanto             | –                    | ΔSS                               | 1                 | 186       |
| BP318   | 2007           | 1 y         | 0              | Kanto             | –                    | ΔSS                               | 1                 | 186       |
| BP466   | 2008           | 33 y        | Unknown        | Kanto             | –                    | ΔSS                               | 1                 | 186       |
| BP469   | 2008           | 8 y         | Unknown        | Kanto             | –                    | ΔSS                               | 1                 | 186       |
| BP346   | 2009           | 2 mo        | 0              | Chubu             | –                    | ΔSS                               | 1                 | 186       |
| BP351   | 2009           | 4 mo        | Unknown        | Shikoku           | –                    | ΔSS                               | 1                 | 186       |
| BP458   | 2009           | 70 y        | Unknown        | Kanto             | –                    | ΔSS                               | 1                 | 186       |
| BP459   | 2009           | 5 mo        | Unknown        | Kanto             | –                    | ΔSS                               | 1                 | 186       |
| BP460   | 2009           | 6 mo        | Unknown        | Kanto             | –                    | ΔSS                               | 1                 | 186       |
| BP357   | 2010           | 12 y        | Unknown        | Kanto             | –                    | ΔSS                               | 1                 | 186       |
| BP358   | 2010           | 10 y        | Unknown        | Kanto             | –                    | ΔSS                               | 1                 | 186       |
| BP359   | 2010           | Unknown     | Unknown        | Kanto             | –                    | ΔSS                               | 1                 | 186       |
| BP360   | 2010           | Unknown     | Unknown        | Kanto             | –                    | ΔSS                               | 1                 | 186       |
| BP361   | 2010           | 10 y        | Unknown        | Kanto             | –                    | ΔSS                               | 1                 | 186       |
| BP363   | 2010           | Unknown     | Unknown        | Kanto             | –                    | ΔSS                               | 1                 | 186       |
| BP365   | 2010           | Unknown     | Unknown        | Kanto             | –                    | ΔSS                               | 1                 | 186       |
| BP366   | 2010           | 6 y         | Unknown        | Kanto             | –                    | ΔSS                               | 1                 | 186       |
| BP378   | 2011           | 21 y        | Unknown        | Kyusyu            | –                    | ΔSS                               | 1                 | 186       |
| BP390   | 2011           | 4 y         | Unknown        | Kinki             | –                    | ΔSS                               | 1                 | 316       |
| BP394   | 2011           | 5 mo        | 0              | Kyusyu            | –                    | <i>prn</i>                        | 2                 | 27        |
|         |                |             |                |                   |                      | (transcriptional down–regulation) |                   |           |
| BP395   | 2011           | 6 mo        | 0              | Kinki             | –                    | ΔSS                               | 1                 | 186       |
| BP397   | 2011           | 7 y         | Unknown        | Kinki             | –                    | ΔSS                               | 1                 | 186       |
| BP398   | 2011           | 4 mo        | 0              | Kinki             | –                    | ΔSS                               | 1                 | 225       |
| BP400   | 2011           | 5 y         | Unknown        | Kinki             | –                    | ΔSS                               | 1                 | 186       |
| BP401   | 2011           | 9 y         | 4              | Kinki             | –                    | ΔSS                               | 1                 | 314       |
| BP403   | 2011           | 2 mo        | 0              | Kinki             | –                    | ΔSS                               | 1                 | 315       |
| BP417   | 2011           | 35 y        | 4              | Kanto             | –                    | ΔSS                               | 1                 | 186       |
| BP437   | 2011           | 1 mo        | 0              | Kinki             | –                    | ΔSS                               | 1                 | 186       |
| BP438   | 2011           | 2 mo        | 0              | Kinki             | –                    | ΔSS                               | 1                 | 186       |
| BP451   | 2011           | 3 mo        | 0              | Kinki             | –                    | ΔSS                               | 1                 | 186       |
| BP452   | 2011           | 7 mo        | Unknown        | Kinki             | –                    | ΔSS                               | 1                 | 186       |
| BP410   | 2012           | 1 mo        | 0              | Tohoku            | –                    | ΔSS                               | 1                 | 186       |
| BP412   | 2012           | 26 y        | Unknown        | Shikoku           | –                    | ΔSS                               | 1                 | 186       |

| Isolate | Isolation year | Patient age | Vaccine status | Origin (district) | Pertactin production | <i>prn</i> gene | <i>prn</i> allele | MLVA type |
|---------|----------------|-------------|----------------|-------------------|----------------------|-----------------|-------------------|-----------|
| BP416   | 2012           | 3 mo        | 0              | Kanto             | -                    | ΔSS             | 1                 | 186       |
| BP418   | 2012           | 5 y         | 4              | Kanto             | -                    | ΔSS             | 1                 | 186       |
| BP440   | 2012           | 10 y        | 4              | Kinki             | -                    | ΔSS             | 1                 | 186       |
| BP442   | 2012           | 2 y         | 0              | Kinki             | -                    | ΔSS             | 1                 | 316       |
| BP447   | 2012           | 28 y        | Unknown        | Kyusyu            | -                    | ΔSS             | 1                 | 186       |
| BP478   | 2012           | 5 y         | Unknown        | Kinki             | -                    | ΔSS             | 1                 | 186       |
| BP480   | 2013           | 2 mo        | 0              | Kinki             | -                    | ΔSS             | 1                 | 224       |
| BP481   | 2013           | 1 mo        | 0              | Kinki             | -                    | ΔSS             | 1                 | 186       |
| BP510   | 2015           | 1 mo        | 0              | Kinki             | -                    | ΔSS             | 1                 | 186       |
| BP533   | 2015           | 1 mo        | 0              | Kinki             | -                    | 245-246::IS481  | 2                 | 27        |
| BP535   | 2015           | 3 mo        | 0              | Kyusyu            | -                    | ΔSS             | 1                 | 186       |
| BP550   | 2016           | 7 y         | 4              | Kanto             | -                    | ΔSS             | 1                 | 186       |
| BP283   | 2005           | 9 y         | Unknown        | Kanto             | +                    | <i>prn</i>      | 2                 | 27        |
| BP284   | 2005           | 1 mo        | 0              | Chubu             | +                    | <i>prn</i>      | 1                 | 186       |
| BP289   | 2005           | 6 mo        | 0              | Kinki             | +                    | <i>prn</i>      | 2                 | 27        |
| BP290   | 2005           | 1 y         | 0              | Chugoku           | +                    | <i>prn</i>      | 2                 | 27        |
| BP294   | 2005           | 10 mo       | 1              | Kyusyu            | +                    | <i>prn</i>      | 2                 | 27        |
| BP296   | 2005           | 6 y         | 0              | Kyusyu            | +                    | <i>prn</i>      | 2                 | 27        |
| BP297   | 2005           | 3 mo        | 0              | Chugoku           | +                    | <i>prn</i>      | 2                 | 22        |
| BP298   | 2005           | 3 mo        | 0              | Kinki             | +                    | <i>prn</i>      | 2                 | 69        |
| BP300   | 2005           | 2 mo        | 0              | Kyusyu            | +                    | <i>prn</i>      | 2                 | 26        |
| BP301   | 2005           | 11 mo       | 0              | Kyusyu            | +                    | <i>prn</i>      | 2                 | 27        |
| BP303   | 2005           | 1 mo        | 0              | Chugoku           | +                    | <i>prn</i>      | 1                 | 224       |
| BP306   | 2006           | 10 y        | 4              | Chubu             | +                    | <i>prn</i>      | 2                 | 69        |
| BP311   | 2006           | 1 y         | Unknown        | Tohoku            | +                    | <i>prn</i>      | 1                 | 187       |
| BP335   | 2006           | 0 y         | Unknown        | Kinki             | +                    | <i>prn</i>      | 1                 | 186       |
| BP312   | 2007           | 4 mo        | 0              | Kanto             | +                    | <i>prn</i>      | 2                 | 27        |
| BP316   | 2007           | 53 y        | Unknown        | Tohoku            | +                    | <i>prn</i>      | 1                 | 234       |
| BP317   | 2007           | 11 y        | Unknown        | Tohoku            | +                    | <i>prn</i>      | 1                 | 234       |
| BP324   | 2007           | 65 y        | Unknown        | Kanto             | +                    | <i>prn</i>      | 2                 | 27        |
| BP327   | 2007           | 10 y        | Unknown        | Shikoku           | +                    | <i>prn</i>      | 1                 | 229       |
| BP330   | 2007           | 6 mo        | 0              | Chubu             | +                    | <i>prn</i>      | 2                 | 27        |
| BP336   | 2007           | 0 y         | 2              | Kinki             | +                    | <i>prn</i>      | 2                 | 27        |
| BP337   | 2007           | 43 y        | Unknown        | Kinki             | +                    | <i>prn</i>      | 2                 | 27        |
| BP343   | 2007           | 0 y         | Unknown        | Kanto             | +                    | <i>prn</i>      | 2                 | 95        |
| BP331   | 2008           | 1 y         | 0              | Chubu             | +                    | <i>prn</i>      | 2                 | 27        |
| BP338   | 2008           | 11 y        | 2              | Kinki             | +                    | <i>prn</i>      | 2                 | 27        |
| BP339   | 2008           | 8 y         | Unknown        | Kinki             | +                    | <i>prn</i>      | 2                 | 27        |
| BP340   | 2008           | 29 y        | Unknown        | Kinki             | +                    | <i>prn</i>      | 2                 | 27        |
| BP341   | 2008           | 6 y         | Unknown        | Kinki             | +                    | <i>prn</i>      | 1                 | 187       |
| BP342   | 2008           | 0 y         | Unknown        | Kinki             | +                    | <i>prn</i>      | 2                 | 27        |
| BP344   | 2008           | 5 y         | Unknown        | Chubu             | +                    | <i>prn</i>      | 2                 | 27        |
| BP345   | 2008           | 4 y         | Unknown        | Chubu             | +                    | <i>prn</i>      | 2                 | 27        |
| BP464   | 2008           | 3 mo        | 0              | Kanto             | +                    | <i>prn</i>      | 2                 | 27        |
| BP465   | 2008           | 27 y        | Unknown        | Kanto             | +                    | <i>prn</i>      | 2                 | 27        |
| BP467   | 2008           | 8 mo        | Unknown        | Kanto             | +                    | <i>prn</i>      | 2                 | 27        |
| BP347   | 2009           | 3 y         | 0              | Shikoku           | +                    | <i>prn</i>      | 9                 | 27        |
| BP348   | 2009           | 41 y        | Unknown        | Chubu             | +                    | <i>prn</i>      | 2                 | 27        |
| BP349   | 2009           | 2 mo        | 0              | Kyusyu            | +                    | <i>prn</i>      | 1                 | 186       |
| BP350   | 2009           | 13 y        | 4              | Chubu             | +                    | <i>prn</i>      | 1                 | 186       |
| BP352   | 2009           | 1 mo        | 0              | Shikoku           | +                    | <i>prn</i>      | 1                 | 34        |
| BP353   | 2009           | 12 y        | Unknown        | Kyusyu            | +                    | <i>prn</i>      | 2                 | 22        |
| BP354   | 2009           | 1 mo        | 0              | Kyusyu            | +                    | <i>prn</i>      | 1                 | 311       |
| BP355   | 2009           | 6 mo        | Unknown        | Kinki             | +                    | <i>prn</i>      | 1                 | 27        |
| BP356   | 2010           | 2 mo        | 0              | Kinki             | +                    | <i>prn</i>      | ND                | 221       |
| BP362   | 2010           | 3 y         | Unknown        | Kyusyu            | +                    | <i>prn</i>      | 2                 | 27        |
| BP364   | 2010           | 8 y         | Unknown        | Kanto             | +                    | <i>prn</i>      | 2                 | 27        |
| BP367   | 2010           | 9 y         | Unknown        | Kyusyu            | +                    | <i>prn</i>      | ND                | 27        |
| BP368   | 2010           | 5 mo        | Unknown        | Kyusyu            | +                    | <i>prn</i>      | 1                 | 186       |
| BP369   | 2010           | 15 y        | Unknown        | Kyusyu            | +                    | <i>prn</i>      | 2                 | 27        |
| BP371   | 2010           | 1 mo        | 0              | Kyusyu            | +                    | <i>prn</i>      | 1                 | 186       |
| BP462   | 2010           | 6 mo        | Unknown        | Kanto             | +                    | <i>prn</i>      | 2                 | 27        |
| BP470   | 2010           | 1 mo        | 0              | Kanto             | +                    | <i>prn</i>      | 2                 | 27        |
| BP376   | 2011           | 2 mo        | 0              | Chubu             | +                    | <i>prn</i>      | 2                 | 27        |
| BP377   | 2011           | 1 mo        | 0              | Chugoku           | +                    | <i>prn</i>      | 2                 | 27        |
| BP380   | 2011           | 11 y        | Unknown        | Kyusyu            | +                    | <i>prn</i>      | 2                 | 27        |
| BP388   | 2011           | 3 y         | Unknown        | Kyusyu            | +                    | <i>prn</i>      | ND                | 27        |
| BP389   | 2011           | 3 mo        | 1              | Kanto             | +                    | <i>prn</i>      | 2                 | 27        |

| Isolate | Isolation year | Patient age | Vaccine status | Origin (district) | Pertactin production | <i>prn</i> gene | <i>prn</i> allele | MLVA type |
|---------|----------------|-------------|----------------|-------------------|----------------------|-----------------|-------------------|-----------|
| BP391   | 2011           | 5 y         | Unknown        | Kanto             | +                    | <i>prn</i>      | 2                 | 27        |
| BP392   | 2011           | 4 mo        | Unknown        | Kanto             | +                    | <i>prn</i>      | ND                | 27        |
| BP393   | 2011           | 11 mo       | Unknown        | Kyusyu            | +                    | <i>prn</i>      | 2                 | 27        |
| BP396   | 2011           | 1 mo        | 0              | Kinki             | +                    | <i>prn</i>      | 1                 | 187       |
| BP399   | 2011           | 2 y         | Unknown        | Kinki             | +                    | <i>prn</i>      | ND                | 27        |
| BP402   | 2011           | 1 mo        | 0              | Kinki             | +                    | <i>prn</i>      | ND                | 27        |
| BP404   | 2011           | 10 y        | Unknown        | Kyusyu            | +                    | <i>prn</i>      | 2                 | 27        |
| BP405   | 2011           | 14 y        | Unknown        | Kyusyu            | +                    | <i>prn</i>      | ND                | 27        |
| BP406   | 2011           | 1 mo        | 0              | Kyusyu            | +                    | <i>prn</i>      | ND                | 27        |
| BP407   | 2011           | 6 mo        | Unknown        | Kyusyu            | +                    | <i>prn</i>      | 2                 | 27        |
| BP430   | 2011           | 1 y         | 3              | Kinki             | +                    | <i>prn</i>      | 2                 | 27        |
| BP431   | 2011           | 2 mo        | 0              | Kinki             | +                    | <i>prn</i>      | 9                 | 27        |
| BP432   | 2011           | 8 y         | 0              | Kinki             | +                    | <i>prn</i>      | 2                 | 27        |
| BP433   | 2011           | 5 mo        | 0              | Kinki             | +                    | <i>prn</i>      | 2                 | 27        |
| BP436   | 2011           | 4 mo        | 0              | Kinki             | +                    | <i>prn</i>      | ND                | 27        |
| BP453   | 2011           | 6 mo        | 0              | Kinki             | +                    | <i>prn</i>      | 1                 | 186       |
| BP463   | 2011           | 3 mo        | 1              | Kanto             | +                    | <i>prn</i>      | 2                 | 27        |
| BP471   | 2011           | 2 mo        | 0              | Kanto             | +                    | <i>prn</i>      | 2                 | 27        |
| BP493   | 2011           | Unknown     | Unknown        | Kanto             | +                    | <i>prn</i>      | ND                | 27        |
| BP494   | 2011           | 0 y         | Unknown        | Kanto             | +                    | <i>prn</i>      | ND                | 27        |
| BP501   | 2011           | Unknown     | Unknown        | Kinki             | +                    | <i>prn</i>      | ND                | 27        |
| BP408   | 2012           | 5 mo        | Unknown        | Kanto             | +                    | <i>prn</i>      | ND                | 27        |
| BP409   | 2012           | 4 mo        | Unknown        | Tohoku            | +                    | <i>prn</i>      | 2                 | 27        |
| BP411   | 2012           | 17 y        | Unknown        | Tohoku            | +                    | <i>prn</i>      | ND                | 27        |
| BP413   | 2012           | 10 y        | 4              | Kanto             | +                    | <i>prn</i>      | 2                 | 27        |
| BP414   | 2012           | 1 mo        | 0              | Chubu             | +                    | <i>prn</i>      | 2                 | 27        |
| BP415   | 2012           | 8 y         | Unknown        | Kanto             | +                    | <i>prn</i>      | ND                | 27        |
| BP420   | 2012           | 4 mo        | 0              | Kanto             | +                    | <i>prn</i>      | 2                 | 27        |
| BP421   | 2012           | 5 mo        | Unknown        | Kanto             | +                    | <i>prn</i>      | ND                | 27        |
| BP422   | 2012           | 8 y         | Unknown        | Kanto             | +                    | <i>prn</i>      | ND                | 27        |
| BP423   | 2012           | 8 y         | Unknown        | Kanto             | +                    | <i>prn</i>      | 2                 | 27        |
| BP424   | 2012           | 9 y         | Unknown        | Kanto             | +                    | <i>prn</i>      | ND                | 27        |
| BP425   | 2012           | 7 y         | Unknown        | Kanto             | +                    | <i>prn</i>      | ND                | 27        |
| BP426   | 2012           | 8 y         | Unknown        | Kanto             | +                    | <i>prn</i>      | ND                | 27        |
| BP427   | 2012           | 4 y         | Unknown        | Kanto             | +                    | <i>prn</i>      | ND                | 27        |
| BP428   | 2012           | 10 y        | Unknown        | Kanto             | +                    | <i>prn</i>      | ND                | 27        |
| BP429   | 2012           | 12 y        | Unknown        | Kanto             | +                    | <i>prn</i>      | ND                | 27        |
| BP434   | 2012           | 7 y         | Unknown        | Kanto             | +                    | <i>prn</i>      | 2                 | 27        |
| BP435   | 2012           | 7 y         | Unknown        | Kanto             | +                    | <i>prn</i>      | ND                | 27        |
| BP439   | 2012           | 3 mo        | Unknown        | Kinki             | +                    | <i>prn</i>      | 2                 | 27        |
| BP441   | 2012           | 3 mo        | Unknown        | Kinki             | +                    | <i>prn</i>      | ND                | 186       |
| BP443   | 2012           | 3 mo        | Unknown        | Kinki             | +                    | <i>prn</i>      | 2                 | 27        |
| BP444   | 2012           | 1 mo        | 0              | Tohoku            | +                    | <i>prn</i>      | 3                 | 27        |
| BP445   | 2012           | 1 mo        | 0              | Tohoku            | +                    | <i>prn</i>      | 2                 | 27        |
| BP446   | 2012           | 2 mo        | 0              | Tohoku            | +                    | <i>prn</i>      | 2                 | 27        |
| BP448   | 2012           | 2 mo        | 0              | Kinki             | +                    | <i>prn</i>      | 2                 | 27        |
| BP449   | 2012           | 4 mo        | 2              | Kinki             | +                    | <i>prn</i>      | 2                 | 27        |
| BP450   | 2012           | 1 mo        | 0              | Kinki             | +                    | <i>prn</i>      | 2                 | 27        |
| BP454   | 2012           | 11 y        | Unknown        | Tohoku            | +                    | <i>prn</i>      | 9                 | 27        |
| BP455   | 2012           | 1 mo        | Unknown        | Tohoku            | +                    | <i>prn</i>      | 2                 | 27        |
| BP456   | 2012           | 0 mo        | 0              | Tohoku            | +                    | <i>prn</i>      | 2                 | 27        |
| BP472   | 2012           | 1 mo        | 0              | Kanto             | +                    | <i>prn</i>      | 2                 | 27        |
| BP477   | 2012           | 2 mo        | 0              | Kinki             | +                    | <i>prn</i>      | ND                | 27        |
| BP495   | 2012           | 0 y         | Unknown        | Tohoku            | +                    | <i>prn</i>      | ND                | 27        |
| BP496   | 2012           | Unknown     | Unknown        | Kanto             | +                    | <i>prn</i>      | ND                | 27        |
| BP513   | 2012           | 3 mo        | 0              | Kyusyu            | +                    | <i>prn</i>      | ND                | 27        |
| BP514   | 2012           | 4 mo        | ≥1             | Kyusyu            | +                    | <i>prn</i>      | ND                | 27        |
| BP515   | 2012           | 5 mo        | ≥1             | Kyusyu            | +                    | <i>prn</i>      | ND                | 26        |
| BP538   | 2012           | 0 mo        | 0              | Tohoku            | +                    | <i>prn</i>      | ND                | 27        |
| BP473   | 2013           | 29 y        | ≥1             | Shikoku           | +                    | <i>prn</i>      | ND                | 27        |
| BP474   | 2013           | 31 y        | Unknown        | Kyusyu            | +                    | <i>prn</i>      | ND                | 186       |
| BP475   | 2013           | 8 y         | Unknown        | Kyusyu            | +                    | <i>prn</i>      | ND                | 28        |
| BP479   | 2013           | 10 y        | 0              | Kinki             | +                    | <i>prn</i>      | ND                | 27        |
| BP482   | 2013           | 4 mo        | Unknown        | Kanto             | +                    | <i>prn</i>      | ND                | 27        |
| BP483   | 2013           | 52 y        | Unknown        | Kyusyu            | +                    | <i>prn</i>      | ND                | 27        |
| BP497   | 2013           | 3 mo        | Unknown        | Kanto             | +                    | <i>prn</i>      | ND                | 27        |
| BP498   | 2013           | 5 y         | Unknown        | Tohoku            | +                    | <i>prn</i>      | ND                | 27        |
| BP516   | 2013           | 2 mo        | 0              | Kyusyu            | +                    | <i>prn</i>      | ND                | 27        |

| Isolate | Isolation year | Patient age | Vaccine status | Origin (district) | Pertactin production | <i>prn</i> gene | <i>prn</i> allele | MLVA type |
|---------|----------------|-------------|----------------|-------------------|----------------------|-----------------|-------------------|-----------|
| BP484   | 2014           | 1 mo        | 0              | Kyusyu            | +                    | <i>prn</i>      | ND                | 28        |
| BP485   | 2014           | 13 y        | Unknown        | Kyusyu            | +                    | <i>prn</i>      | ND                | 27        |
| BP486   | 2014           | 1 mo        | 0              | Shikoku           | +                    | <i>prn</i>      | ND                | 27        |
| BP487   | 2014           | 1 mo        | 0              | Kanto             | +                    | <i>prn</i>      | ND                | 27        |
| BP488   | 2014           | 1 mo        | 0              | Chugoku           | +                    | <i>prn</i>      | ND                | 27        |
| BP489   | 2014           | 5 y         | Unknown        | Kyusyu            | +                    | <i>prn</i>      | ND                | 27        |
| BP490   | 2014           | 3 mo        | 0              | Chugoku           | +                    | <i>prn</i>      | ND                | 27        |
| BP491   | 2014           | 8 y         | 4              | Kinki             | +                    | <i>prn</i>      | ND                | 27        |
| BP499   | 2014           | 3 mo        | Unknown        | Kinki             | +                    | <i>prn</i>      | ND                | 27        |
| BP500   | 2014           | 30 y        | Unknown        | Kyusyu            | +                    | <i>prn</i>      | ND                | 27        |
| BP502   | 2014           | 1 mo        | 0              | Kanto             | +                    | <i>prn</i>      | ND                | 27        |
| BP503   | 2014           | 1 mo        | 0              | Kanto             | +                    | <i>prn</i>      | ND                | 27        |
| BP505   | 2014           | 36 y        | Unknown        | Kinki             | +                    | <i>prn</i>      | ND                | 27        |
| BP506   | 2014           | 10 y        | Unknown        | Hokkaidou         | +                    | <i>prn</i>      | ND                | 27        |
| BP517   | 2014           | 1 mo        | 0              | Kyusyu            | +                    | <i>prn</i>      | ND                | 27        |
| BP518   | 2014           | 1 mo        | 0              | Kyusyu            | +                    | <i>prn</i>      | ND                | 27        |
| BP519   | 2014           | 8 y         | Unknown        | Kyusyu            | +                    | <i>prn</i>      | ND                | 27        |
| BP520   | 2014           | 13 y        | Unknown        | Kyusyu            | +                    | <i>prn</i>      | ND                | 27        |
| BP521   | 2014           | 6 y         | ≥1             | Kyusyu            | +                    | <i>prn</i>      | ND                | 27        |
| BP522   | 2014           | 6 y         | ≥1             | Kyusyu            | +                    | <i>prn</i>      | ND                | 27        |
| BP523   | 2014           | 8 y         | ≥1             | Kyusyu            | +                    | <i>prn</i>      | ND                | 27        |
| BP524   | 2014           | 4 mo        | Unknown        | Kyusyu            | +                    | <i>prn</i>      | ND                | 27        |
| BP525   | 2014           | 1 mo        | 0              | Kyusyu            | +                    | <i>prn</i>      | ND                | 27        |
| BP526   | 2014           | 2 mo        | 0              | Kyusyu            | +                    | <i>prn</i>      | ND                | 27        |
| BP527   | 2014           | 2 mo        | 0              | Kyusyu            | +                    | <i>prn</i>      | ND                | 29        |
| BP532   | 2014           | 4 mo        | 0              | Kyusyu            | +                    | <i>prn</i>      | ND                | 27        |
| BP507   | 2015           | 3 mo        | Unknown        | Kinki             | +                    | <i>prn</i>      | ND                | 78        |
| BP508   | 2015           | 1 mo        | 0              | Chubu             | +                    | <i>prn</i>      | ND                | 27        |
| BP509   | 2015           | 32 y        | Unknown        | Kyusyu            | +                    | <i>prn</i>      | ND                | 29        |
| BP511   | 2015           | 2 mo        | 0              | Kyusyu            | +                    | <i>prn</i>      | ND                | 96        |
| BP512   | 2015           | 8 y         | 4              | Kinki             | +                    | <i>prn</i>      | ND                | 27        |
| BP528   | 2015           | 1 mo        | 0              | Kyusyu            | +                    | <i>prn</i>      | ND                | 27        |
| BP529   | 2015           | 2 mo        | 0              | Kyusyu            | +                    | <i>prn</i>      | ND                | 27        |
| BP530   | 2015           | 3 mo        | 0              | Kyusyu            | +                    | <i>prn</i>      | ND                | 27        |
| BP531   | 2015           | 3 mo        | Unknown        | Kyusyu            | +                    | <i>prn</i>      | ND                | 27        |
| BP534   | 2015           | 0 mo        | 0              | Kyusyu            | +                    | <i>prn</i>      | ND                | 27        |
| BP536   | 2015           | 3 mo        | 1              | Shikoku           | +                    | <i>prn</i>      | ND                | 27        |
| BP537   | 2015           | 2 mo        | 0              | Kinki             | +                    | <i>prn</i>      | ND                | 31        |
| BP539   | 2015           | 1 mo        | 0              | Tohoku            | +                    | <i>prn</i>      | ND                | 32        |
| BP540   | 2015           | 1 mo        | 0              | Tohoku            | +                    | <i>prn</i>      | ND                | 27        |
| BP541   | 2015           | 6 mo        | 0              | Kinki             | +                    | <i>prn</i>      | ND                | 27        |
| BP551   | 2015           | 12 y        | 3              | Chubu             | +                    | <i>prn</i>      | 2                 | 27        |
| BP542   | 2016           | 9 y         | 4              | Hokkaidou         | +                    | <i>prn</i>      | 2                 | 27        |
| BP543   | 2016           | 10 y        | Unknown        | Kinki             | +                    | <i>prn</i>      | 2                 | 27        |
| BP544   | 2016           | 1 mo        | 0              | Kyusyu            | +                    | <i>prn</i>      | 1                 | 34        |
| BP545   | 2016           | 13 y        | 4              | Chubu             | +                    | <i>prn</i>      | 2                 | 27        |
| BP549   | 2016           | 9 y         | 4              | Hokkaidou         | +                    | <i>prn</i>      | 2                 | 27        |
| BP555   | 2016           | 6 mo        | 3              | Chubu             | +                    | <i>prn</i>      | 2                 | 28        |
| BP556   | 2016           | 8 y         | 4              | Kanto             | +                    | <i>prn</i>      | 2                 | 27        |

\*, negative; +, positive; ND, not determined; MLVA, multilocus variable number tandem repeat analysis.

Technical Appendix Table 2. Primers used in this study of *Bordetella pertussis* isolates, Japan, 2008–2016\*

| Designation      | Primer name     | Sequence (5' to 3')  |
|------------------|-----------------|----------------------|
| Conventional PCR | SS-defect-F5    | CTCTGTCACGCATTGACAAC |
|                  | SS-outerR       | CTCGGCCGCGGGATTTTCTA |
|                  | IS481-combine-F | GCAGACGCCACTAGGTGTGA |
|                  | IS481-combine-R | AAAGGTCGCCGCGCTGCCTA |
| qRT PCR          | qprn-F          | ATCGTCAAGACCGGTGAGCG |
|                  | qprn-R          | CTGACGGCCGCTTACCTTGA |
|                  | qrecA-F         | CCAATGTGGTCGACAAGTCC |
|                  | qrecA-R         | ATGGCCATTCCTTGTGCTC  |

\*qRT–PCR, quantitative reverse transcription PCR.

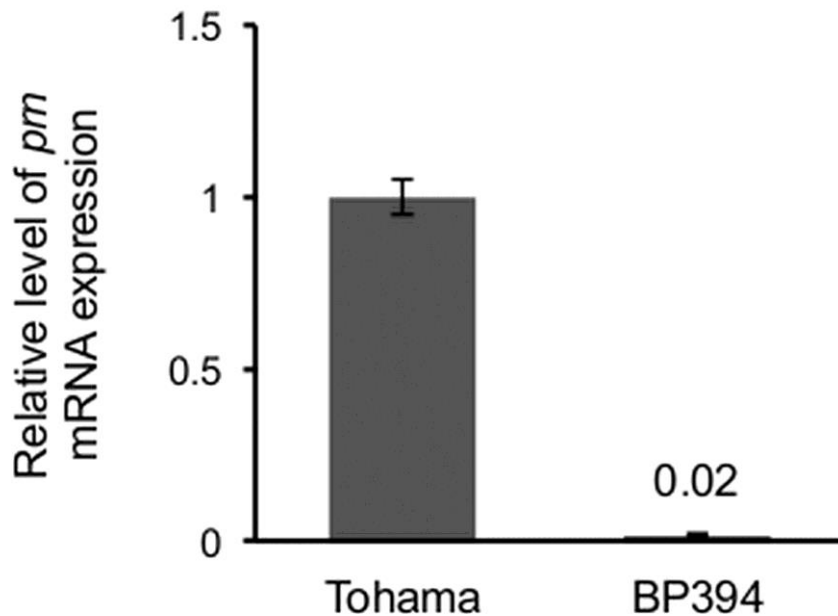

Technical Appendix Figure. Lack of *pm* transcript expression in pertactin–deficient *Bordetella pertussis* isolate BP394. The pertactin–deficient isolate was cultured for 3 days on Bordet–Gengou agar. Total RNA was isolated by using the RNeasy Mini Kit (QIAGEN, Hilden, Germany) and treated with RNase–Free DNase (QIAGEN) to degrade contaminating DNA. Total RNA (0.1  $\mu$ g) was reverse–transcribed into cDNA by using the PrimeScript RT Master Mix with random hexamers (TaKaRa Bio, Inc., Shiga, Japan). Relative levels of *pm* and *recA* transcripts were determined using SYBR Premix Ex *TaqII* (TaKaRa Bio) with the ABI PRISM 7500 Fast Real–Time PCR System (Applied Biosystems, Waltham, MA, USA). Quantitative reverse transcription–PCR (qRT–PCR) conditions were 10 s at 95°C, followed by 40 cycles of 95°C for 3 s, and 60°C for 30 s. Primer sets qprn–F/qprn–R and qrecA–F/qrecA–R were used for *pm* and *recA* amplification, respectively (Technical Appendix Table 2). The relative *pm* transcript level was calculated using the  $\Delta\Delta$ Ct method and was normalized to that of *recA*. The *recA* transcript was used as an internal control for each sample. Data are presented as -fold- changes in expression compared with

those observed in *B. pertussis* strain Tohama. The mean  $\pm$  SDs of results obtained from 3 separate experiments are shown.
